# Supplementary material
Source: PubMed Central journal article supplement (PMC4913327)
Supplement: Supplementary_Table_1_229.pdf [file Supplementary_Table_1_229.pdf]

Supplementary Table 1. Meta-analysis of Observational Studies in Epidemiology (MOOSE) Checklist

|                                                                                                            | Reported on page                                       |
|------------------------------------------------------------------------------------------------------------|--------------------------------------------------------|
| <b>Reporting of background should include</b>                                                              |                                                        |
| Problem definition                                                                                         | 5                                                      |
| Hypothesis statement                                                                                       | 5 and 6                                                |
| Description of study outcomes                                                                              | 10-15, Table 1                                         |
| Type of exposure or intervention used                                                                      | 10-15 Table 2 and 3                                    |
| Type of study designs used                                                                                 | 10-15, Table 1                                         |
| Study population                                                                                           | 10-15                                                  |
| <b>Reporting of search strategy should include</b>                                                         |                                                        |
| Qualifications of searchers (eg librarians and investigators)                                              | 1                                                      |
| Search strategy, including time period used in the synthesis and key words                                 | 7, Suppl Table 2                                       |
| Effort to include all available studies, including contact with authors                                    | All studies were available                             |
| Databases and registries searched                                                                          | 7                                                      |
| Search software used, name and version, including special features used (eg explosion)                     | 7, Suppl Table 2                                       |
| Use of hand searching (eg reference lists of obtained articles)                                            | 7, Figure 1                                            |
| List of citations located and those excluded, including justification                                      | 10, Figure 1                                           |
| Method of addressing articles published in languages other than English                                    | All studies were published in English or Spanish       |
| Method of handling abstracts and unpublished studies                                                       | The systematic review was limited to published studies |
| Description of any contact with authors                                                                    | None                                                   |
| <b>Reporting of methods should include</b>                                                                 |                                                        |
| Description of relevance or appropriateness of studies assembled for assessing the hypothesis to be tested | 7 and 8                                                |

|                                                                                                                                                                                                                                                                             |                                                    |
|-----------------------------------------------------------------------------------------------------------------------------------------------------------------------------------------------------------------------------------------------------------------------------|----------------------------------------------------|
| Rationale for the selection and coding of data (eg sound clinical principles or convenience)                                                                                                                                                                                | 7 and 8                                            |
| Documentation of how data were classified and coded (eg multiple raters, blinding and interrater reliability)                                                                                                                                                               | 8                                                  |
| Assessment of confounding (eg comparability of cases and controls in studies where appropriate)                                                                                                                                                                             | There were no controlled studies                   |
| Assessment of study quality, including blinding of quality assessors, stratification or regression on possible predictors of study results                                                                                                                                  | Figure 2                                           |
| Assessment of heterogeneity                                                                                                                                                                                                                                                 | 9                                                  |
| Description of statistical methods (eg complete description of fixed or random effects models, justification of whether the chosen models account for predictors of study results, dose-response models, or cumulative meta-analysis) in sufficient detail to be replicated | 9                                                  |
| Provision of appropriate tables and graphics                                                                                                                                                                                                                                | Table 1-3, Figure 1-2, and Supplementary documents |
| <b>Reporting of results should include</b>                                                                                                                                                                                                                                  |                                                    |
| Graphic summarizing individual study estimates and overall estimate                                                                                                                                                                                                         | Not possible                                       |
| Table giving descriptive information for each study included                                                                                                                                                                                                                | Table 1-3.                                         |
| Results of sensitivity testing (eg subgroup analysis)                                                                                                                                                                                                                       | Not enough studies were available                  |
| Indication of statistical uncertainty of findings                                                                                                                                                                                                                           | 15                                                 |
| <b>Reporting of discussion should include</b>                                                                                                                                                                                                                               |                                                    |
| Quantitative assessment of bias (eg publication bias)                                                                                                                                                                                                                       | 17, 18 and Figure 2                                |
| Justification for exclusion (eg exclusion of non-English language citations)                                                                                                                                                                                                | 10 and Figure 1                                    |
| Assessment of quality of included studies                                                                                                                                                                                                                                   | 8, 9 and Figure 2                                  |
| <b>Reporting of conclusions should include</b>                                                                                                                                                                                                                              |                                                    |
| Consideration of alternative explanations for observed results                                                                                                                                                                                                              | 17, 18                                             |
| Generalization of the conclusions (eg appropriate for the data presented and within the domain of the literature review)                                                                                                                                                    | 17, 18                                             |
| Guidelines for future research                                                                                                                                                                                                                                              | 17, 18                                             |
