# Supplementary material
Source: PubMed Central journal article supplement (PMC4913327)
Supplement: Supplementary_Table_2_229.pdf [file Supplementary_Table_2_229.pdf]

## Supplementary Table 2. Search strategy used in main databases

### Scopus

(pylori) AND (guided OR tailored OR based) AND (rescue OR failure OR third-line OR fourth-line) AND (sensibility OR sensitivity OR susceptibility OR resistance OR culture). Article Title, Abstract, Keywords

### Isi Web of Knowledge

(pylori) AND (guided OR tailored OR based) AND (rescue OR failure OR third-line OR fourth-line) AND (sensibility OR sensitivity OR susceptibility OR resistance OR culture). Topic. Refined by: DOCUMENT TYPES: ( ARTICLE OR CLINICAL TRIAL OR REVIEW OR ABSTRACT OR MEETING OR OTHER )

### Pubmed

(pylori) AND (guided OR tailored OR based) AND (rescue OR failure OR third-line OR fourth-line) AND (sensibility OR sensitivity OR susceptibility OR resistance OR culture)

### Cochrane Library

(pylori) AND (guided OR tailored OR based) AND (rescue OR failure OR third-line OR fourth-line) AND (sensibility OR sensitivity OR susceptibility OR resistance OR culture). Title, Abstract, Keyword
